# Supplementary material
Source: PubMed Central journal article supplement (PMC3754727)
Supplement: AEM.00706-13_zam999104591so1.pdf [file AEM.00706-13_zam999104591so1.pdf]

1 **Figure S1.** (A) Exponentially growing cells were infected with iEPS5  
2 (MOI, 0.01) and incubated at 37°C. After centrifugation and filtration,  
3 the phage titer in the filtrate was determined by standard overlay  
4 assay. The results are expressed as means and standard deviations of  
5 triplicate assays. (B) One-step growth curve analysis  
6 of *S. Typhimurium* SL1344 infected by iEPS5. E, eclipse period; L,  
7 latent period; B, burst size. Closed squares, non-chloroform-treated  
8 sample; opened circle, chloroform-treated sample. The error bars  
9 indicate standard deviations.

10

11 **Figure S2.** Motility and dotting assay of iEPS5 resistant isolates. (A)  
12 Motility of six candidate mutants was assessed. One micro liter of an  
13 overnight culture of each candidate isolate was spotted in the middle  
14 of a swim plate (LB, 0.3% agar) and incubated at 37°C for 8 h. SL1344  
15 (WT), CH507 ( $\Delta fliC$ ), CH508 ( $\Delta fliB$ ), and CH509 ( $\Delta fliC/\Delta fliB$ ) strains  
16 were used for control. (B) Serially diluted phage was spotted onto  
17 plates of the single flagellin mutants (CH507,  $\Delta fliC$  and CH508  $\Delta fliB$ )  
18 and double mutant (CH509,  $\Delta fliC/\Delta fliB$ ). The serially diluted phages  
19 from  $10^2$  to  $10^9$  PFU/ml were used as indicated inside circle.

20

21 **Figure S3.** Motility and dotting assay were performed using various  
22 mutants, which have different motile phenotypes. SJW2811 (extreme  
23 CW-biased), SJW3076 (CCW-biased), MMTA19 (slow *motA* mutant),  
24 MMTA173 (slow *motA* mutant), MMTB135 (slow *motB* mutant),  
25 MMTB6055 (slow *motB* mutant).

26

27 **Figure S4.** Polyhook structure and unbound form of phage.  
28 Transmission electron micrograph of iEPS5 and polyhook strain  
29 (CH506,  $\Delta$ *filK*). Arrows designate phage, tail fiber, and polyhook  
30 (PH).

31

32 **Figure S5.** Visualization of bacterial cells during infection by SYBR-  
33 gold-labeled EPS7 phage. The SYBR-gold-labeled EPS7 particles  
34 known to use BtuB as a receptor (1) were seen as dots adhered to the  
35 surface of bacteria in contrast to iEPS5 or Chi particles shown  
36 adhered to the flagellar filament in Fig. 5 at 10 min after infection.  
37 The cytosol of the whole bacteria was fluorescent at 1 h after  
38 infection due to the SYBR-gold-labeled EPS7 DNA injected. LM, light

39 microscopy; EFM, epifluorescence microscopy; Merge, LM+EFM,  
40 Magnification = 1,000X.

41

42 **Figure S6.** Phylogenetic analysis of terminase large subunits in iEPS5  
43 with various bacteriophages. Amino acid sequences of terminase  
44 large subunits were compared by ClustalW alignments and the  
45 phylogenetic tree was generated by the neighbor-joining method  
46 with *P* distance values using MEGA5 program.

47

48

49 **Table S1.** The bacterial strains and plasmids used in this study

50

| Strain or plasmid                 | Description                                                                                                         | Reference or source <sup>a</sup> |
|-----------------------------------|---------------------------------------------------------------------------------------------------------------------|----------------------------------|
| <b>S. Typhimurium</b>             |                                                                                                                     |                                  |
| SL1344                            | Wild-type                                                                                                           | NCTC                             |
| CH501                             | $\Delta$ <i>fliR</i>                                                                                                | This study                       |
| CH502                             | $\Delta$ <i>flgK</i>                                                                                                | This study                       |
| CH504                             | $\Delta$ <i>motA</i>                                                                                                | This study                       |
| CH505                             | $\Delta$ <i>cheY</i>                                                                                                | This study                       |
| CH506                             | $\Delta$ <i>fliK</i>                                                                                                | This study                       |
| CH507                             | $\Delta$ <i>fliC</i>                                                                                                | This study                       |
| CH508                             | $\Delta$ <i>fljB</i>                                                                                                | This study                       |
| CH509                             | $\Delta$ <i>fliC/\Delta</i> <i>fljB</i>                                                                             | This study                       |
| CH511                             | $\Delta$ <i>fliR/p</i> ACYC- <i>fliR</i>                                                                            | This study                       |
| CH512                             | $\Delta$ <i>flgK/p</i> ACYC- <i>flgK</i>                                                                            | This study                       |
| CH514                             | $\Delta$ <i>motA/p</i> UHE- <i>motA</i>                                                                             | This study                       |
| CH515                             | $\Delta$ <i>cheY/p</i> UHE- <i>cheY</i>                                                                             | This study                       |
| CH516                             | $\Delta$ <i>fliK/p</i> UHE- <i>fliK</i>                                                                             | This study                       |
| SJW2811                           | <i>AfliG</i> ( $\Delta$ 169-171) CW-biased                                                                          | (2)                              |
| SJW3076                           | $\Delta$ <i>cheA</i> to <i>cheZ</i> CCW-biased                                                                      | (3)                              |
| <b>E. coli</b>                    |                                                                                                                     |                                  |
| DH5 $\alpha$                      | <i>supE44 hsdR17 recA1 gyrA96 thi-1 relA1</i>                                                                       | (4)                              |
| EC100D <sup>TM</sup>              | <i>pir</i> <sup>+</sup>                                                                                             | Epicentre                        |
| <b>Plasmid</b>                    |                                                                                                                     |                                  |
| pUHE21-2 <i>lacI</i> <sup>q</sup> | rep <sub>pMB1</sub> Ap <sup>r</sup> <i>lacI</i> <sup>q</sup>                                                        | (5)                              |
| pACYC184                          | rep <sub>p15A</sub> Cm <sup>r</sup> Tet <sup>r</sup>                                                                | (6)                              |
| pKD13                             | rep <sub>R6K<math>\gamma</math></sub> Ap <sup>r</sup> -FRT Km <sup>r</sup> -FRT                                     | (7)                              |
| pKD46                             | rep <sub>pSC101<sup>ts</sup></sub> Ap <sup>r</sup> P <sub><i>araBAD</i></sub> $\gamma$ $\beta$ <i>exo</i>           | (7)                              |
| pCP20                             | rep <sub>pSC101<sup>ts</sup></sub> Ap <sup>r</sup> Cm <sup>r</sup> <i>cI857</i> $\lambda$ P <sub>R</sub> <i>flp</i> | (8)                              |
| pACYC- <i>fliR</i>                | rep <sub>p15A</sub> Cm <sup>r</sup> Tet <sup>r</sup> <i>fliR</i>                                                    | This study                       |
| pACYC- <i>flgK</i>                | rep <sub>p15A</sub> Cm <sup>r</sup> Tet <sup>r</sup> <i>flgK</i>                                                    | This study                       |
| pUHE- <i>motA</i>                 | rep <sub>pMB1</sub> Ap <sup>r</sup> <i>lacI</i> <sup>q</sup> <i>motA</i>                                            | This study                       |
| pUHE- <i>cheY</i>                 | rep <sub>pMB1</sub> Ap <sup>r</sup> <i>lacI</i> <sup>q</sup> <i>cheY</i>                                            | This study                       |
| pUHE- <i>fliK</i>                 | rep <sub>pMB1</sub> Ap <sup>r</sup> <i>lacI</i> <sup>q</sup> <i>fliK</i>                                            | This study                       |

51 <sup>a</sup> NCTC, National Collection of Type Cultures

52 **Table S2.** Oligonucleotide used for the construction of stains and  
 53 plasmids  
 54

| Primer name          | Sequence (5' → 3')                                                               | Purpose                                                                       |
|----------------------|----------------------------------------------------------------------------------|-------------------------------------------------------------------------------|
| <i>fliR</i> -lamb-F  | ATTACGTGCGCACTCTGTTTCAGCAATTTACCTTATATCA<br>TCGGATAAACAGAACGTGTAGGCTGGAGCTGCTTCG | λ Red deletion<br>of <i>fliR</i>                                              |
| <i>fliR</i> -lamb-R  | TTTAAAATTTATTTTCGGATAAACCTTAGTAAAACAGGA<br>TAAAAATTATGGGTTAATTCCGGGGATCCGTCGACC  |                                                                               |
| <i>flgK</i> -lamb-F  | GCCGATAACAACGAGTATTGAAGGATTA<br>AGGAACCATCTGTAGGCTGGAGCTGCTTCG                   | λ Red deletion<br>of <i>flgK</i>                                              |
| <i>flgK</i> -lamb-R  | TACATCATCTGGGTAAGTATGATACGCATGTCA<br>TCCTTCTCCTATTCCGGGGATCCGTCGACC              |                                                                               |
| <i>motA</i> -lamb-F  | CTGCGCATCCTGTCATAGTCAACAGCGGAA<br>GGATGATGCTGTAGGCTGGAGCTGCTTCG                  | λ Red deletion<br>of <i>motA</i>                                              |
| <i>motA</i> -lamb-R  | CTGCGGCGTTTTACGACGACAATGGGATGA<br>GCCTGATTTTATTCCGGGGATCCGTCGACC                 |                                                                               |
| <i>cheY</i> -lamb-F  | TGGCGAAAATCAGTGCCGGACAGGCGATACGTATTTG<br>AACCAGGAGTAGTATTTTTGTAGGCTGGAGCTGCTTCG  | λ Red deletion<br>of <i>cheY</i>                                              |
| <i>cheY</i> -lamb-R  | TCCTGCTGAGCCTTCATCAGCAGGCTTGATAGATGGTT<br>GCATCATCATCGCATCCATTCCGGGGATCCGTCGACC  |                                                                               |
| <i>fliK</i> -lamb-F  | TCTGGCGCTCCTGGCGGGCGGTTAGGCGC<br>AGACGGCGCATGTAGGCTGGAGCTGCTTCG                  | λ Red deletion<br>of <i>fliK</i>                                              |
| <i>fliK</i> -lamb-R  | GCCGCTTCCGCCAACTGGGTGCGCAACAT<br>GGGCAGGGCGATTCCGGGGATCCGTCGACC                  |                                                                               |
| <i>fliR</i> -pACYC-F | TCCAGCAATTAAGCTTATATCATCG                                                        | Complementation<br>of <i>fliR</i> gene<br>in pACYC184                         |
| <i>fliR</i> -pACYC-R | ATATCCTGGTGCATGCTTTTTAAAA                                                        |                                                                               |
| <i>flgK</i> -pACYC-F | ACGAGTATTGAAAGCTTAAAAGGAAC                                                       | Complementation<br>of <i>flgK</i> gene<br>in pACYC184                         |
| <i>flgK</i> -pACYC-R | ACTGATACGCATGCCATCCTTC                                                           |                                                                               |
| <i>motA</i> -pUHE-F  | CCCGACTGCGAATTCGTGCATAGT                                                         | Overexpression of<br><i>motA</i> gene<br>in pUHE21-2 <i>lacI</i> <sup>q</sup> |
| <i>motA</i> -pUHE-R  | GGGACTCCGGATCCAAATCC                                                             |                                                                               |
| <i>cheY</i> -pUHE-F  | GCGATACGAATTCGAACCAGG                                                            | Overexpression of<br><i>cheY</i> gene<br>in pUHE21-2 <i>lacI</i> <sup>q</sup> |
| <i>cheY</i> -pUHE-R  | TTGATAGATGGATCCATCATCATC                                                         |                                                                               |
| <i>fliK</i> -pUHE-F  | CGTGCAGCAATGAGGAATTCGGA                                                          | Overexpression of<br><i>fliK</i> gene<br>in pUHE21-2 <i>lacI</i> <sup>q</sup> |
| <i>fliK</i> -pUHE-R  | GGATAATCATGGATCCTCTGGCG                                                          |                                                                               |

55

**Table S3.** Features of bacteriophage iEPS5 ORFs, gene products, and functional assignments

| ORF | Gene Strand | Left end | Right end | Length (nt) | No. amino acids | Size (kDa) | pI   | Predictive function  | Best hit                                                                                   | e-value | No. amino acids | Accession no.  |
|-----|-------------|----------|-----------|-------------|-----------------|------------|------|----------------------|--------------------------------------------------------------------------------------------|---------|-----------------|----------------|
| 01  | -           | 551      | 802       | 252         | 84              | 9.4        | 11.2 | hypothetical protein |                                                                                            |         |                 |                |
| 02  | -           | 795      | 1046      | 252         | 84              | 9.4        | 10.1 | hypothetical protein | hypothetical protein<br>[ <i>Enterobacter</i> phage Enc34]                                 | 2e-31   | 167             | YP_007007078.1 |
| 03  | -           | 1039     | 1245      | 207         | 69              | 7.3        | 4.9  | hypothetical protein | hypothetical protein<br>[ <i>Enterobacter</i> phage Enc34]                                 | 1e-08   | 62              | YP_007007076.1 |
| 04  | -           | 1298     | 2458      | 1161        | 387             | 43.5       | 5.2  | hypothetical protein |                                                                                            |         |                 |                |
| 05  | -           | 2584     | 2805      | 222         | 74              | 7.7        | 9.2  | hypothetical protein | hypothetical protein<br>[ <i>Enterobacter</i> phage Enc34]                                 | 3e-18   | 71              | YP_007007071.1 |
| 06  | -           | 2802     | 3350      | 549         | 183             | 20.3       | 5.5  | hypothetical protein | hypothetical protein<br>MetexDRAFT_0343<br>[ <i>Methylobacterium extorquens</i> DSM 13060] | 1e-07   | 116             | ZP_12695608.1  |
| 07  | -           | 3361     | 3564      | 204         | 68              | 7.4        | 9.9  | hypothetical protein | hypothetical protein<br>[ <i>Enterobacter</i> phage Enc34]                                 | 7e-08   | 61              | YP_007007068.1 |
| 08  | -           | 3576     | 4199      | 624         | 208             | 24.4       | 5.0  | hypothetical protein | hypothetical protein<br>HMPREF9944_00383<br>[ <i>Prevotella maculosa</i> OT 289]           | 1e-17   | 196             | ZP_09552119.1  |
| 09  | -           | 4202     | 4402      | 201         | 67              | 7.8        | 11.0 | hypothetical protein | hypothetical protein<br>[ <i>Enterobacter</i> phage Enc34]                                 | 6e-27   | 67              | YP_007007066.1 |
| 10  | -           | 4417     | 4956      | 540         | 180             | 20.0       | 9.4  | hypothetical protein |                                                                                            |         |                 |                |
| 11  | -           | 4975     | 5232      | 258         | 86              | 10.0       | 7.7  | hypothetical protein | hypothetical protein PP1_003<br>[ <i>Pectobacterium</i> phage PP1]                         | 6e-10   | 74              | YP_007010646.1 |
| 12  | +           | 5993     | 6364      | 372         | 124             | 13.5       | 5.4  | hypothetical protein | hypothetical protein<br>[ <i>Enterobacter</i> phage Enc34]                                 | 2e-52   | 127             | YP_007007063.1 |

**Table S3.** Features of bacteriophage iEPS5 ORFs, gene products, and functional assignments (continued)

| ORF | Gene Strand | Left end | Right end | Length (nt) | No. amino acids | Size (kDa) | pI   | Predictive function                                   | Best hit                                                               | e-value | No. amino acids | Accession no.  |
|-----|-------------|----------|-----------|-------------|-----------------|------------|------|-------------------------------------------------------|------------------------------------------------------------------------|---------|-----------------|----------------|
| 13  | +           | 6436     | 6876      | 441         | 147             | 16.4       | 5.2  | hypothetical protein                                  | hypothetical protein<br>[ <i>Enterobacter</i> phage Enc34]             | 4e-27   | 150             | YP_007007062.1 |
| 14  | +           | 6863     | 7198      | 336         | 112             | 12.3       | 9.8  | hypothetical protein                                  | hypothetical protein<br>[ <i>Enterobacter</i> phage Enc34]             | 3e-26   | 115             | YP_007007061.1 |
| 15  | +           | 7185     | 7526      | 342         | 114             | 12.7       | 5.1  | hypothetical protein                                  | hypothetical protein<br>[ <i>Enterobacter</i> phage Enc34]             | 4e-10   | 123             | YP_007007060.1 |
| 16  | +           | 7507     | 8583      | 1077        | 359             | 40.1       | 5.0  | putative recombination<br>-associated protein<br>RdgC | recombination-associated protein<br>[ <i>Staphylococcus</i> phage SA1] | 0.0     | 358             | ACZ55522.1     |
| 17  | +           | 8586     | 8819      | 234         | 78              | 9.1        | 10.1 | hypothetical protein                                  | hypothetical protein<br>[ <i>Enterobacter</i> phage Enc34]             | 3e-26   | 87              | YP_007007058.1 |
| 18  | +           | 8824     | 9099      | 276         | 92              | 10.9       | 5.7  | hypothetical protein                                  | hypothetical protein Redjac_0170<br>[ <i>Providencia</i> phage Redjac] | 5e-29   | 92              | YP_006906001.1 |
| 19  | +           | 9295     | 10035     | 741         | 247             | 28.1       | 5.4  | hypothetical protein                                  | hypothetical protein Redjac_0160<br>[ <i>Providencia</i> phage Redjac] | 5e-87   | 246             | YP_006906000.1 |
| 20  | +           | 10032    | 10706     | 675         | 225             | 24.9       | 7.5  | hypothetical protein                                  | hypothetical protein<br>[ <i>Enterobacter</i> phage Enc34]             | 1e-22   | 201             | YP_007007055.1 |
| 21  | +           | 10703    | 11803     | 1101        | 367             | 40.7       | 5.5  | hypothetical protein                                  |                                                                        |         |                 |                |
| 22  | +           | 11803    | 12507     | 705         | 235             | 27.0       | 6.5  | putative N-6-adenine-<br>methyltransferase            | DNA methyltransferase<br>[ <i>Enterobacter</i> phage Enc34]            | 8e-135  | 234             | YP_007007051.1 |
| 23  | +           | 12585    | 13559     | 975         | 325             | 37.0       | 5.6  | hypothetical protein                                  | hypothetical protein Redjac_0130<br>[ <i>Providencia</i> phage Redjac] | 2e-39   | 344             | YP_006905997.1 |

**Table S3.** Features of bacteriophage iEPS5 ORFs, gene products, and functional assignments (continued)

| ORF | Gene Strand | Left end | Right end | Length (nt) | No. amino acids | Size (kDa) | pI   | Predictive function  | Best hit                                                                   | e-value | No. amino acids | Accession no.  |
|-----|-------------|----------|-----------|-------------|-----------------|------------|------|----------------------|----------------------------------------------------------------------------|---------|-----------------|----------------|
| 24  | +           | 13570    | 13764     | 195         | 65              | 7.2        | 9.3  | hypothetical protein | hypothetical protein<br>[ <i>Enterobacter</i> phage Enc34]                 | 4e-11   | 64              | YP_007007049.1 |
| 25  | +           | 13767    | 13982     | 216         | 72              | 8.1        | 5.5  | hypothetical protein | hypothetical protein MTE1_07137<br>[ <i>Klebsiella pneumoniae</i> JHCK1]   | 3e-12   | 77              | ZP_19006088.1  |
| 26  | +           | 13972    | 14226     | 255         | 85              | 9.9        | 9.3  | hypothetical protein | hypothetical protein PA13_02472<br>[ <i>Pseudomonas aeruginosa</i> 138244] | 6e-29   | 89              | ZP_11910685.1  |
| 27  | +           | 14208    | 14720     | 513         | 171             | 19.6       | 9.2  | hypothetical protein |                                                                            |         |                 |                |
| 28  | +           | 14801    | 15082     | 282         | 94              | 10.3       | 5.7  | hypothetical protein | hypothetical protein<br>[ <i>Enterobacter</i> phage Enc34]                 | 6e-17   | 96              | YP_007007048.1 |
| 29  | +           | 15079    | 15390     | 312         | 104             | 12.1       | 5.9  | hypothetical protein |                                                                            |         |                 |                |
| 30  | +           | 15387    | 15839     | 453         | 151             | 17.4       | 10.5 | hypothetical protein | hypothetical protein<br>[ <i>Enterobacter</i> phage Enc34]                 | 7e-18   | 162             | YP_007007047.1 |
| 31  | +           | 15841    | 16554     | 714         | 238             | 27.6       | 9.5  | hypothetical protein | hypothetical protein<br>[ <i>Staphylococcus</i> phage SA1]                 | 5e-138  | 211             | ACZ55544.1     |
| 32  | +           | 16630    | 16914     | 285         | 95              | 11.3       | 7.6  | hypothetical protein | hypothetical protein<br>[ <i>Enterobacter</i> phage Enc34]                 | 4e-36   | 95              | YP_007007043.1 |
| 33  | +           | 16911    | 17372     | 462         | 154             | 17.3       | 6.2  | hypothetical protein | hypothetical protein<br>[ <i>Enterobacter</i> phage Enc34]                 | 6e-27   | 144             | YP_007007041.1 |
| 34  | -           | 17373    | 17576     | 204         | 68              | 7.5        | 5.4  | hypothetical protein | putative Rz1 protein<br>[ <i>Enterobacter</i> phage Enc34]                 | 1e-29   | 68              | YP_007007040.1 |
| 35  | +           | 17578    | 17748     | 171         | 57              | 6.6        | 7.6  | hypothetical protein |                                                                            |         |                 |                |
| 36  | -           | 17754    | 18467     | 714         | 238             | 25.8       | 9.2  | lysis protein A      | lysis protein A<br>[ <i>Salmonella</i> phage iEPS5]                        | 2e-171  | 237             | AEB40057.1     |



**Table S3.** Features of bacteriophage iEPS5 ORFs, gene products, and functional assignments (continued)

| ORF | Gene Strand | Left end | Right end | Length (nt) | No. amino acids | Size (kDa) | pI   | Predictive function              | Best hit                                                               | e-value | No. amino acids | Accession no.  |
|-----|-------------|----------|-----------|-------------|-----------------|------------|------|----------------------------------|------------------------------------------------------------------------|---------|-----------------|----------------|
| 37  | -           | 18471    | 18809     | 339         | 113             | 12.6       | 7.4  | lysis protein B                  | lysis protein B<br>[ <i>Salmonella</i> phage iEPS5]                    | 3e-73   | 112             | AEB40058.1     |
| 38  | -           | 18874    | 21069     | 2196        | 732             | 81.4       | 7.7  | hypothetical protein             | hypothetical protein<br>[ <i>Staphylococcus</i> phage SA1]             | 0.0     | 611             | ACZ55502.1     |
| 39  | -           | 21079    | 22305     | 1227        | 409             | 44.9       | 6.7  | hypothetical protein             | hypothetical protein Redjac_0070<br>[ <i>Providencia</i> phage Redjac] | 4e-50   | 406             | YP_006905991.1 |
| 40  | -           | 22320    | 23339     | 1020        | 340             | 37.0       | 5.4  | hypothetical protein             | hypothetical protein Redjac_0060<br>[ <i>Providencia</i> phage Redjac] | 0.0     | 339             | YP_006905990.1 |
| 41  | -           | 23353    | 24315     | 963         | 321             | 34.9       | 5.0  | hypothetical protein             | hypothetical protein<br>[ <i>Enterobacter</i> phage Enc34]             | 0.0     | 320             | YP_007007033.1 |
| 42  | -           | 24326    | 25333     | 1008        | 336             | 36.6       | 5.5  | hypothetical protein             | hypothetical protein<br>[ <i>Enterobacter</i> phage Enc34]             | 2e-162  | 331             | YP_007007032.1 |
| 43  | -           | 25343    | 26083     | 741         | 247             | 27.3       | 5.2  | hypothetical protein             | tail fiber protein<br>[ <i>Providencia</i> phage Redjac]               | 7e-139  | 246             | YP_006905987.1 |
| 44  | -           | 26083    | 29973     | 3891        | 1297            | 143.3      | 5.1  | hypothetical protein             | tail assembly protein<br>[ <i>Providencia</i> phage Redjac]            | 0.0     | 1287            | YP_006905986.1 |
| 45  | -           | 29963    | 30202     | 240         | 80              | 9.2        | 9.6  | hypothetical protein             | tail assembly protein<br>[ <i>Enterobacter</i> phage Enc34]            | 2e-30   | 77              | YP_007007028.1 |
| 46  | -           | 30202    | 30432     | 231         | 77              | 8.4        | 10.4 | putative tail assembly protein 1 | tail assembly protein<br>[ <i>Enterobacter</i> phage Enc34]            | 2e-32   | 78              | YP_007007027.1 |
| 47  | -           | 30444    | 31262     | 819         | 273             | 29.5       | 5.4  | putative tail assembly protein 2 | conserved tail assembly protein<br>[ <i>Providencia</i> phage Redjac]  | 3e-162  | 272             | YP_006905985.1 |
| 48  | -           | 31272    | 32960     | 1689        | 563             | 63.1       | 5.4  | hypothetical protein             | hypothetical protein<br>[ <i>Staphylococcus</i> phage SA1]             | 0.0     | 562             | ACZ55504.1     |

**Table S3.** Features of bacteriophage iEPS5 ORFs, gene products, and functional assignments (continued)

| ORF | Gene Strand | Left end | Right end | Length (nt) | No. amino acids | Size (kDa) | pI   | Predictive function                         | Best hit                                                                  | e-value | No. amino acids | Accession no.  |
|-----|-------------|----------|-----------|-------------|-----------------|------------|------|---------------------------------------------|---------------------------------------------------------------------------|---------|-----------------|----------------|
| 49  | -           | 32966    | 37261     | 4296        | 1432            | 153.9      | 9.3  | putative tape measure protein               | tape measure protein<br>[ <i>Providencia</i> phage Redjac]                | 0.0     | 1435            | YP_006906025.1 |
| 50  | -           | 37254    | 37451     | 198         | 66              | 7.3        | 10.0 | hypothetical protein                        | pre-tape measure frameshift protein<br>[ <i>Enterobacter</i> phage Enc34] | 4e-29   | 227             | YP_007007021.1 |
| 51  | -           | 37496    | 37957     | 462         | 154             | 16.7       | 5.6  | hypothetical protein                        | pre-tape measure frameshift protein<br>[ <i>Enterobacter</i> phage Enc34] | 1e-49   | 227             | YP_007007021.1 |
| 52  | -           | 38054    | 39193     | 1140        | 380             | 40.3       | 4.9  | bacterial Ig-like domain-containing protein | hypothetical protein<br>[ <i>Staphylococcus</i> phage SA1]                | 0.0     | 379             | ACZ55519.1     |
| 53  | -           | 39207    | 39710     | 504         | 168             | 19.0       | 6.2  | hypothetical protein                        | hypothetical protein<br>[ <i>Enterobacter</i> phage Enc34]                | 1e-89   | 168             | YP_007007019.1 |
| 54  | -           | 39707    | 40333     | 627         | 209             | 22.5       | 10.6 | hypothetical protein                        | hypothetical protein<br>[ <i>Staphylococcus</i> phage SA1]                | 3e-139  | 208             | ACZ55545.1     |
| 55  | -           | 40333    | 40698     | 366         | 122             | 13.5       | 5.4  | hypothetical protein                        | hypothetical protein<br>[ <i>Enterobacter</i> phage Enc34]                | 6e-66   | 120             | YP_007007017.1 |
| 56  | -           | 40701    | 40994     | 294         | 98              | 10.7       | 7.4  | hypothetical protein                        | hypothetical protein Redjac_0360<br>[ <i>Providencia</i> phage Redjac]    | 6e-20   | 90              | YP_006906020.1 |
| 57  | -           | 41056    | 42120     | 1065        | 355             | 40.0       | 6.1  | major capsid protein E                      | capsid protein<br>[ <i>Staphylococcus</i> phage SA1]                      | 0.0     | 354             | ACZ55524.1     |
| 58  | -           | 42133    | 42552     | 420         | 140             | 14.5       | 5.2  | putative decorator protein D                | phage structural protein<br>[ <i>Enterobacter</i> phage Enc34]            | 3e-77   | 139             | YP_007007014.1 |
| 59  | -           | 42567    | 43853     | 1287        | 429             | 45.3       | 4.8  | putative prohead protease ClpP              | prohead protease ClpP<br>[ <i>Staphylococcus</i> phage SA1]               | 0.0     | 438             | ACZ55516.1     |

**Table S3.** Features of bacteriophage iEPS5 ORFs, gene products, and functional assignments (continued)

| ORF | Gene Strand | Left end | Right end | Length (nt) | No. amino acids | Size (kDa) | pI   | Predictive function                     | Best hit                                                               | e-value | No. amino acids | Accession no.  |
|-----|-------------|----------|-----------|-------------|-----------------|------------|------|-----------------------------------------|------------------------------------------------------------------------|---------|-----------------|----------------|
| 60  | -           | 43880    | 45559     | 1680        | 560             | 62.3       | 5.9  | putative lambda family portal protein B | phage portal protein<br>[ <i>Staphylococcus</i> phage SA1]             | 0.0     | 559             | ACZ55505.1     |
| 61  | -           | 45556    | 45810     | 255         | 85              | 9.5        | 7.4  | putative head-to-tail joining protein W | head-to-tail joining protein<br>[ <i>Enterobacter</i> phage Enc34]     | 2e-31   | 83              | YP_007007011.1 |
| 62  | -           | 45821    | 47896     | 2076        | 692             | 78.0       | 6.0  | putative terminase large subunit        | terminase large subunit<br>[ <i>Providencia</i> phage Redjac]          | 0.0     | 691             | YP_006906015.1 |
| 63  | -           | 47886    | 48455     | 570         | 190             | 21.6       | 5.6  | putative terminase small subunit        | terminase small subunit<br>[ <i>Enterobacter</i> phage Enc34]          | 1e-114  | 191             | YP_007007009.1 |
| 64  | -           | 48442    | 49917     | 1476        | 492             | 56.8       | 6.0  | SNF2 domain -containing protein         | helicase<br>[ <i>Staphylococcus</i> phage SA1]                         | 0.0     | 491             | ACZ55509.1     |
| 65  | -           | 49964    | 50251     | 288         | 96              | 11.2       | 9.8  | VRR-NUC domain -containing protein      | VRR-NUC domain protein<br>[ <i>Enterobacter</i> phage Enc34]           | 9e-40   | 95              | YP_007007007.1 |
| 66  | -           | 50253    | 52292     | 2040        | 680             | 77.6       | 8.6  | putative DNA polymerase                 | DNA polymerase I<br>[ <i>Staphylococcus</i> phage SA1]                 | 0.0     | 645             | ACZ55501.1     |
| 67  | -           | 52359    | 52955     | 597         | 199             | 22.6       | 5.4  | hypothetical protein                    | conserved phage protein<br>[ <i>Staphylococcus</i> phage SA1]          | 5e-141  | 198             | ACZ55548.1     |
| 68  | -           | 53010    | 54347     | 1338        | 446             | 50.5       | 5.1  | hypothetical protein                    | conserved phage protein<br>[ <i>Staphylococcus</i> phage SA1]          | 0.0     | 445             | ACZ55515.1     |
| 69  | -           | 54340    | 54765     | 426         | 142             | 15.5       | 10.4 | hypothetical protein                    | hypothetical protein<br>[ <i>Enterobacter</i> phage Enc34]             | 3e-15   | 107             | YP_007007003.1 |
| 70  | -           | 54731    | 55147     | 417         | 139             | 14.3       | 5.4  | hypothetical protein                    | hypothetical protein Redjac_0260<br>[ <i>Providencia</i> phage Redjac] | 9e-35   | 125             | YP_006906010.1 |

**Table S3.** Features of bacteriophage iEPS5 ORFs, gene products, and functional assignments (continued)

| ORF | Gene Strand | Left end | Right end | Length (nt) | No. amino acids | Size (kDa) | pI  | Predictive function               | Best hit                                                                 | e-value | No. amino acids | Accession no.  |
|-----|-------------|----------|-----------|-------------|-----------------|------------|-----|-----------------------------------|--------------------------------------------------------------------------|---------|-----------------|----------------|
| 71  | +           | 55444    | 55671     | 228         | 76              | 8.4        | 7.6 | hypothetical protein              | putative transcriptional regulator<br>[ <i>Enterobacter</i> phage Enc34] | 1e-25   | 93              | YP_007007001.1 |
| 72  | +           | 55668    | 58253     | 2586        | 862             | 98.7       | 5.5 | putative primase                  | DNA primase<br>[ <i>Enterobacter</i> phage Enc34]                        | 0.0     | 864             | YP_007007000.1 |
| 73  | -           | 58289    | 58612     | 324         | 108             | 12.3       | 8.5 | HTH domain<br>-containing protein | helix-turn-helix domain protein<br>[ <i>Desulfovibrio</i> sp. FW1012B]   | 1e-05   | 110             | ZP_09132024.1  |

**Table S4.** Adsorption assay of iEPS5 to several strains and cognate adsorption constant (*k*)

| Strain       | <i>k</i> <sup>a</sup> | Strain                                       | <i>k</i> <sup>a</sup> | Strain                                       | <i>k</i> <sup>a</sup> |
|--------------|-----------------------|----------------------------------------------|-----------------------|----------------------------------------------|-----------------------|
| WT           | 1.924E-09             | WT                                           | 2.008E-09             | WT                                           | 1.959E-09             |
| <i>ΔmotA</i> | 2.457E-11             | <i>ΔcheY</i>                                 | 1.628E-09             | <i>ΔfliK</i>                                 | 5.123E-11             |
| <i>ΔfliR</i> | 7.423E-11             | <i>ΔcheY</i> / pUHE- <i>cheY</i> No IPTG     | 1.433E-09             | <i>ΔfliK</i> / pUHE- <i>fliK</i> No IPTG     | 1.15E-10              |
| <i>ΔflgK</i> | 2.431E-11             | <i>ΔcheY</i> / pUHE- <i>cheY</i> 500 μM IPTG | 2.789E-10             | <i>ΔfliK</i> / pUHE- <i>fliK</i> 100 μM IPTG | 3.645E-10             |
| SJW3076      | 1.413E-09             | <i>ΔcheY</i> / pUHE- <i>cheY</i> 1 mM IPTG   | 1.012E-10             | <i>ΔfliK</i> / pUHE- <i>fliK</i> 200 μM IPTG | 4.914E-10             |
| SJW2811      | 2.31E-11              | <i>ΔcheY</i> / pUHE- <i>cheY</i> 2 mM IPTG   | 4.071E-11             | <i>ΔfliK</i> / pUHE- <i>fliK</i> 500 μM IPTG | 9.325E-10             |

<sup>a</sup> Adsorption constant was calculated by the following formula: constant  $k = -\ln (P_t/P_0)/Nt$ ;

$P_t$  = phage titer at the time  $t$  (PFU/ml),  $P_0$  = initial phage titer (PFU/ml),  $N$  = bacterial density (CFU/ml) and  $t$  =time (min).

## References

1. **Hong J, Kim KP, Heu S, Lee SJ, Adhya S, Ryu S.** 2008. Identification of host receptor and receptor-binding module of a newly sequenced T5-like phage EPS7. *FEMS Microbiol. Lett.* 289:202-209.
2. **Togashi F, Yamaguchi S, Kihara M, Aizawa SI, Macnab RM.** 1997. An extreme clockwise switch bias mutation in *fliG* of *Salmonella typhimurium* and its suppression by slow-motile mutations in *motA* and *motB*. *J. Bacteriol.* 179:2994-3003.
3. **Magariyama Y, Yamaguchi S, Aizawa S.** 1990. Genetic and behavioral analysis of flagellar switch mutants of *Salmonella typhimurium*. *J. Bacteriol.* 172:4359-4369.
4. **Hanahan D.** 1983. Studies on transformation of *Escherichia coli* with plasmids. *J. Mol. Biol.* 166:557-580.
5. **Soncini FC, Vescovi EG, Groisman EA.** 1995. Transcriptional autoregulation of the *Salmonella typhimurium* *phoPQ* operon. *J. Bacteriol.* 177:4364-4371.
6. **Chang AC, Cohen SN.** 1978. Construction and characterization of amplifiable multicopy DNA cloning vehicles derived from the P15A cryptic miniplasmid. *J. Bacteriol.* 134:1141-1156.
7. **Datsenko KA, Wanner BL.** 2000. One-step inactivation of chromosomal genes in *Escherichia coli* K-12 using PCR products. *Proc. Natl. Acad. Sci. U. S. A.* 97:6640-6645.
8. **Doublet B, Douard G, Targant H, Meunier D, Madec JY, Cloeckert A.** 2008. Antibiotic marker modifications of lambda Red and FLP helper plasmids, pKD46 and pCP20, for inactivation of chromosomal genes using PCR products in multidrug-resistant strains. *J. Microbiol. Meth.* 75:359-361.

**A**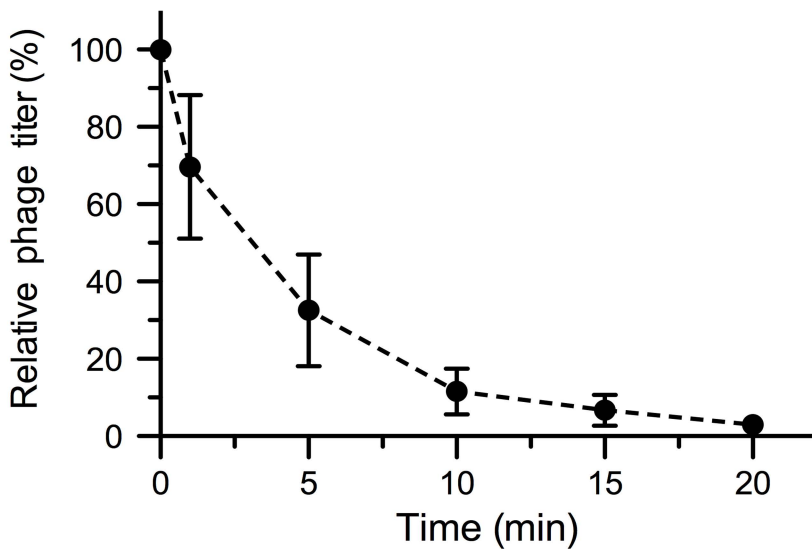**B**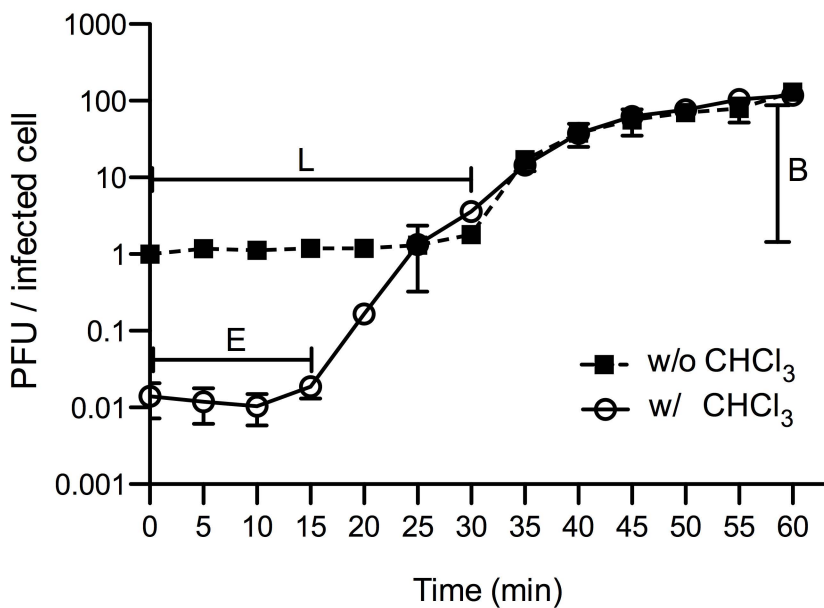**FIG S1**

**A**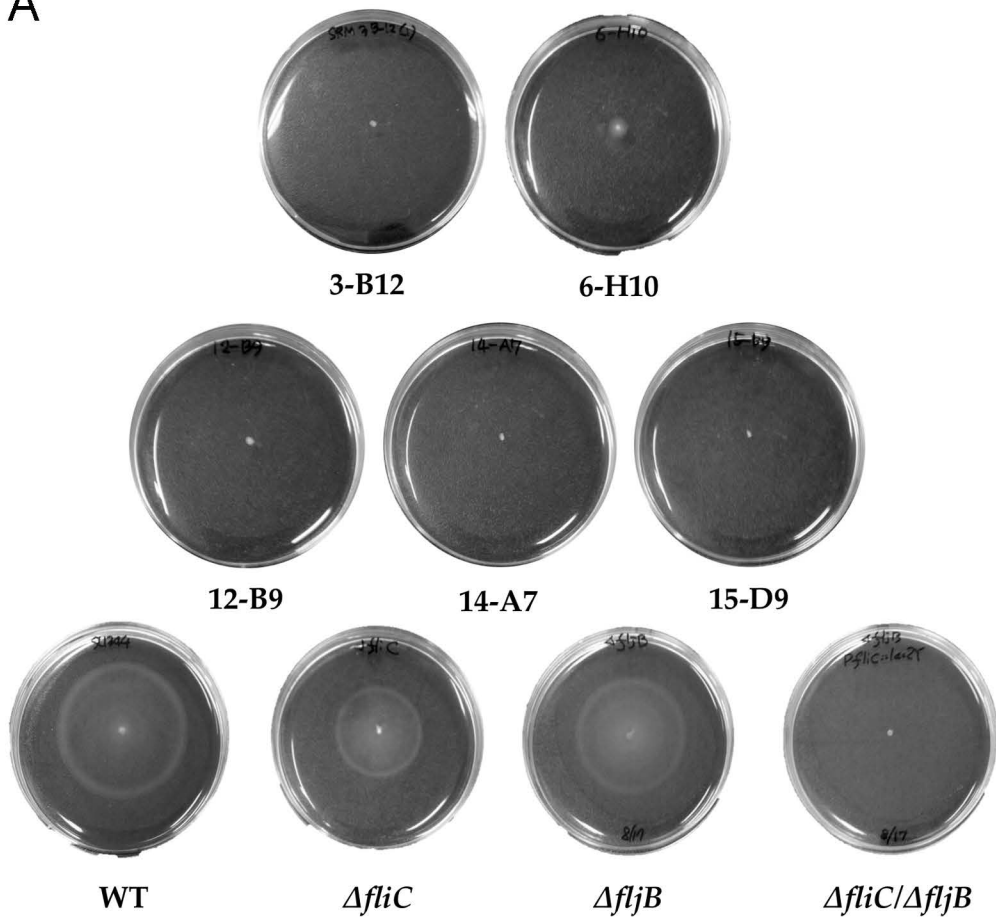**B**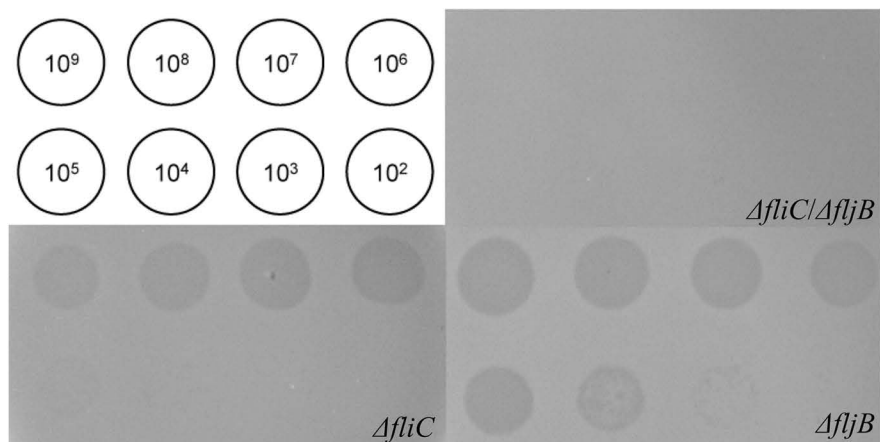



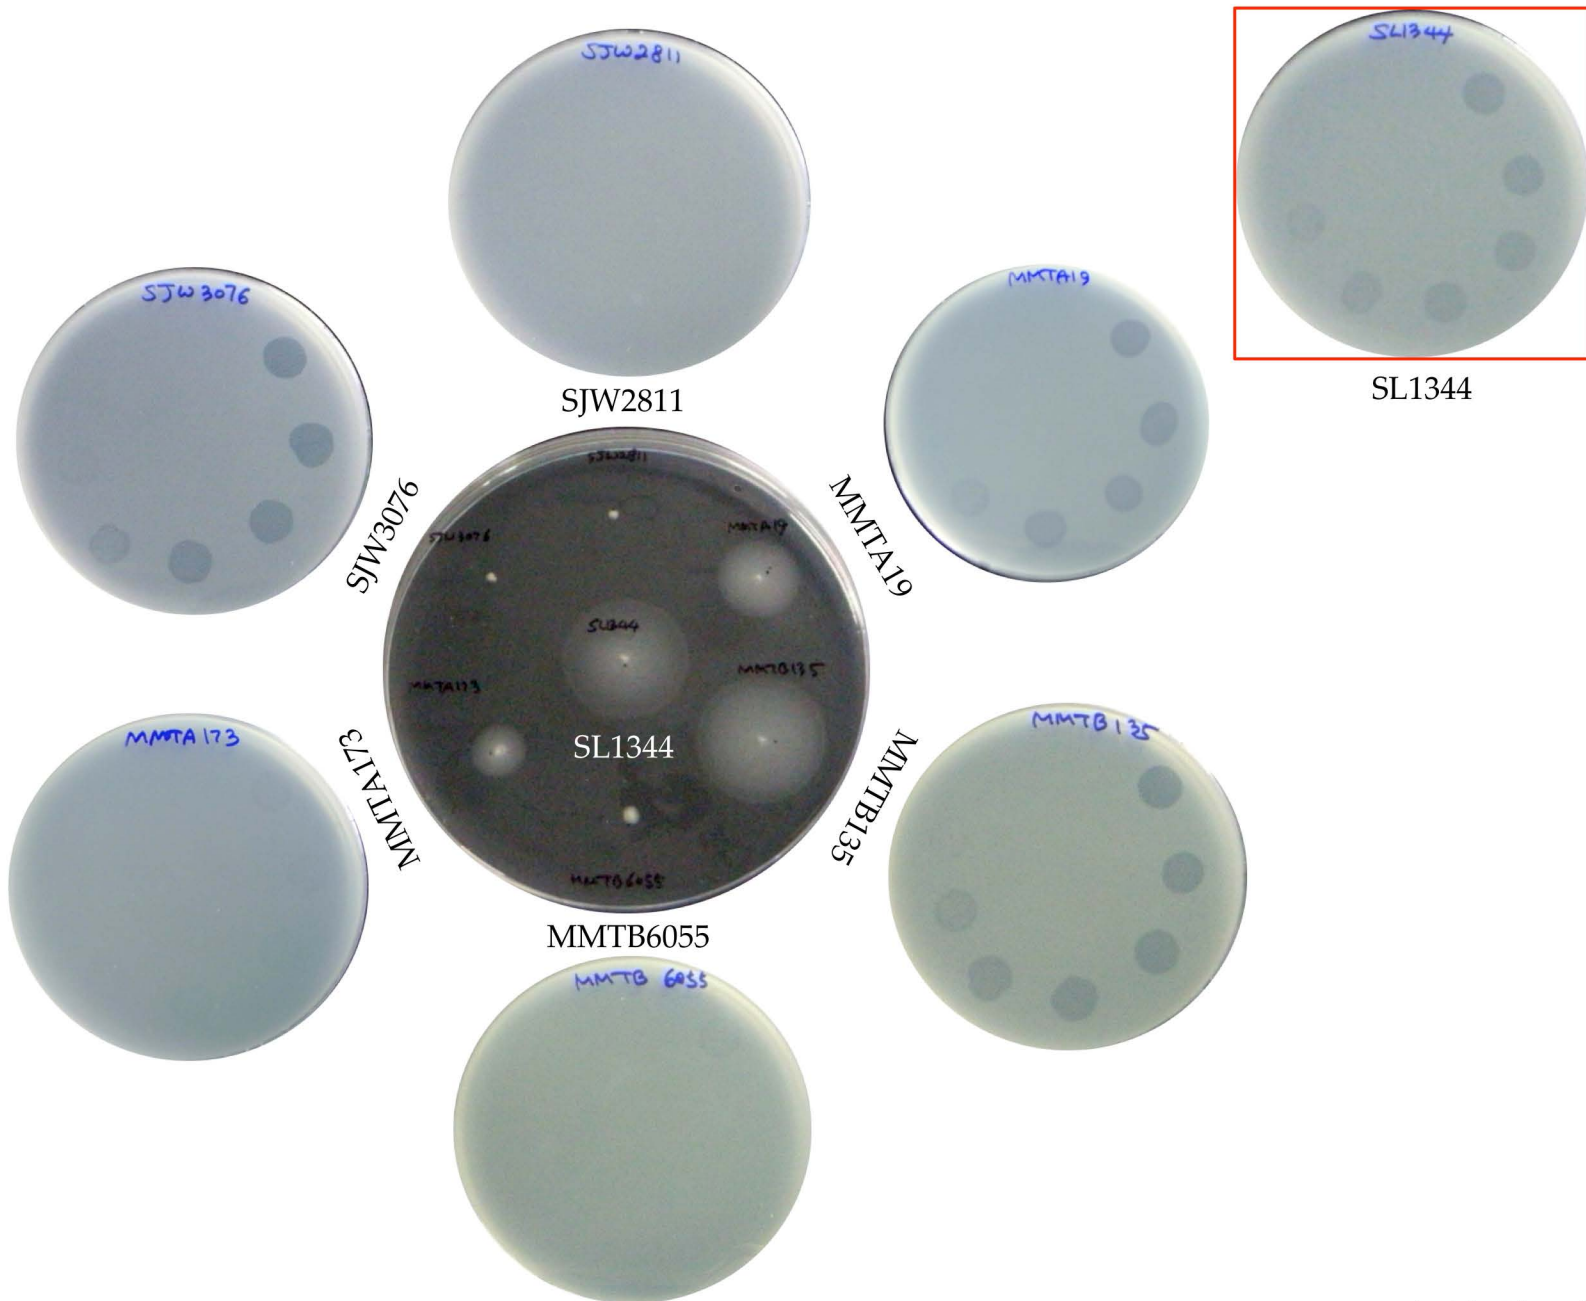

FIG S3

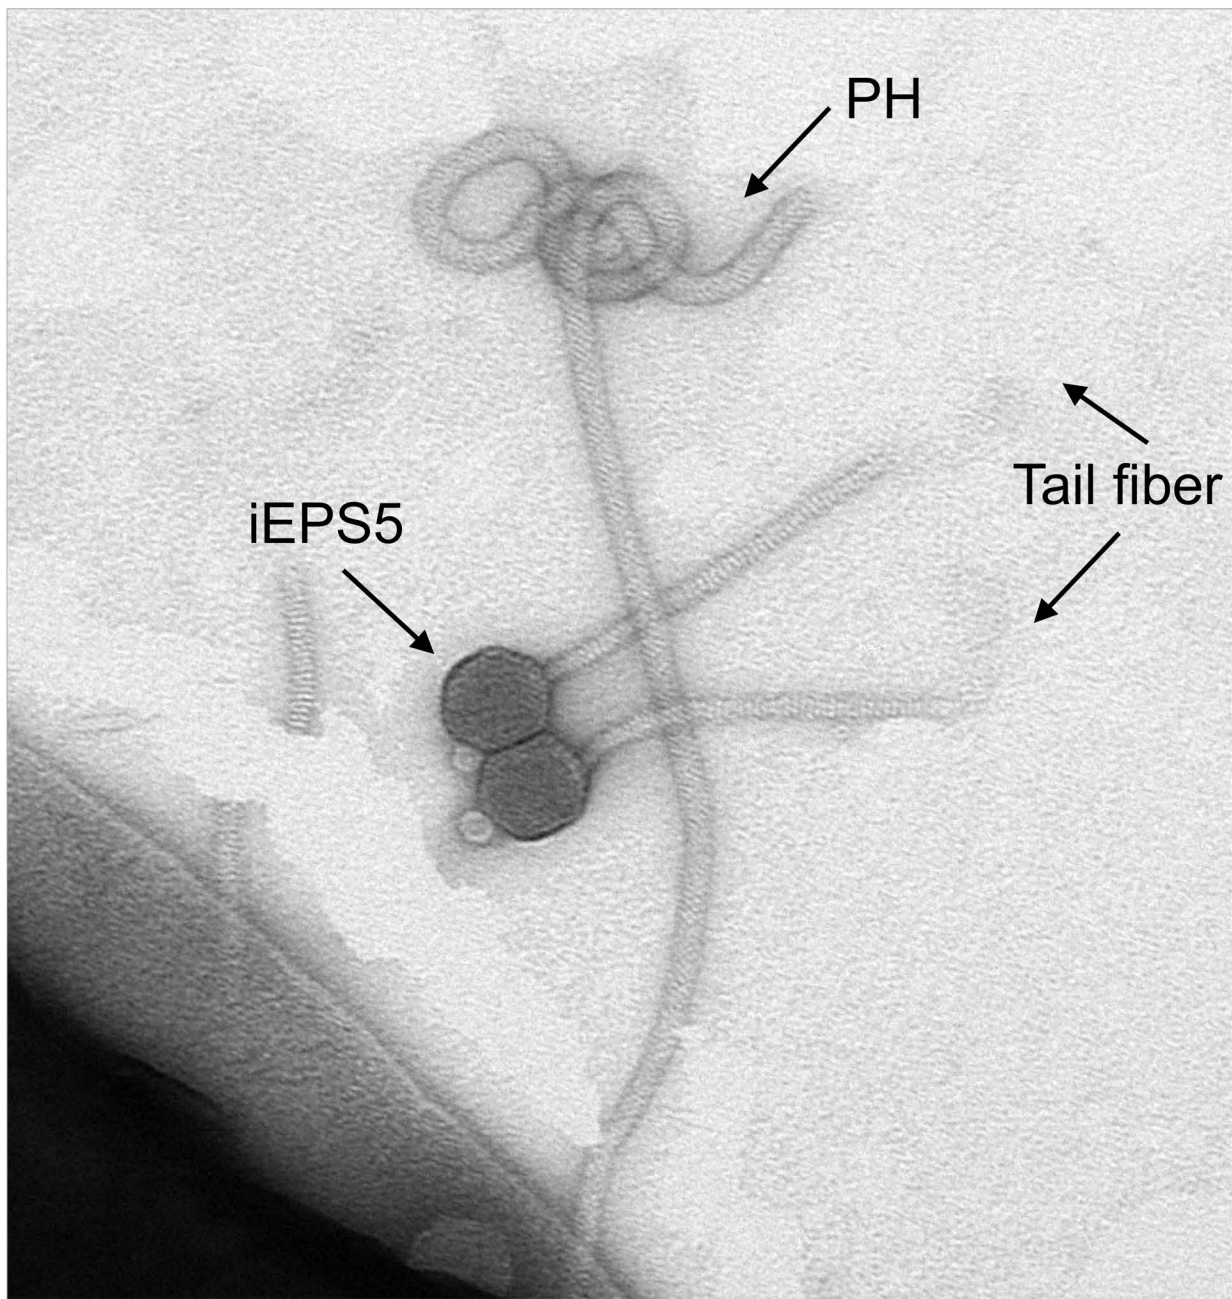

FIG S4

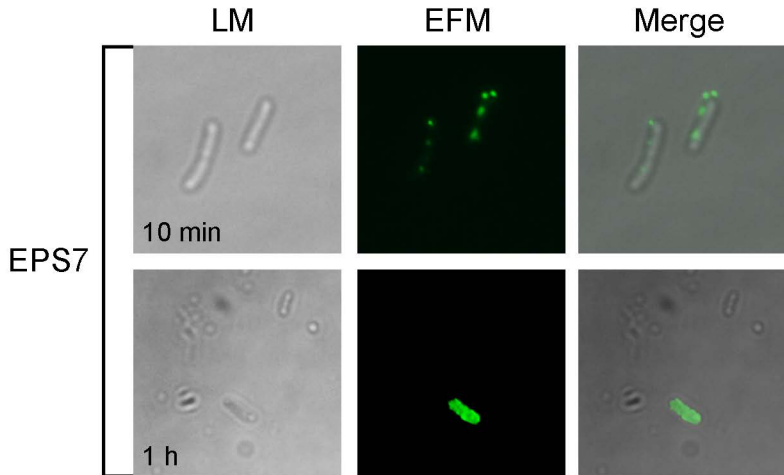

FIGS5

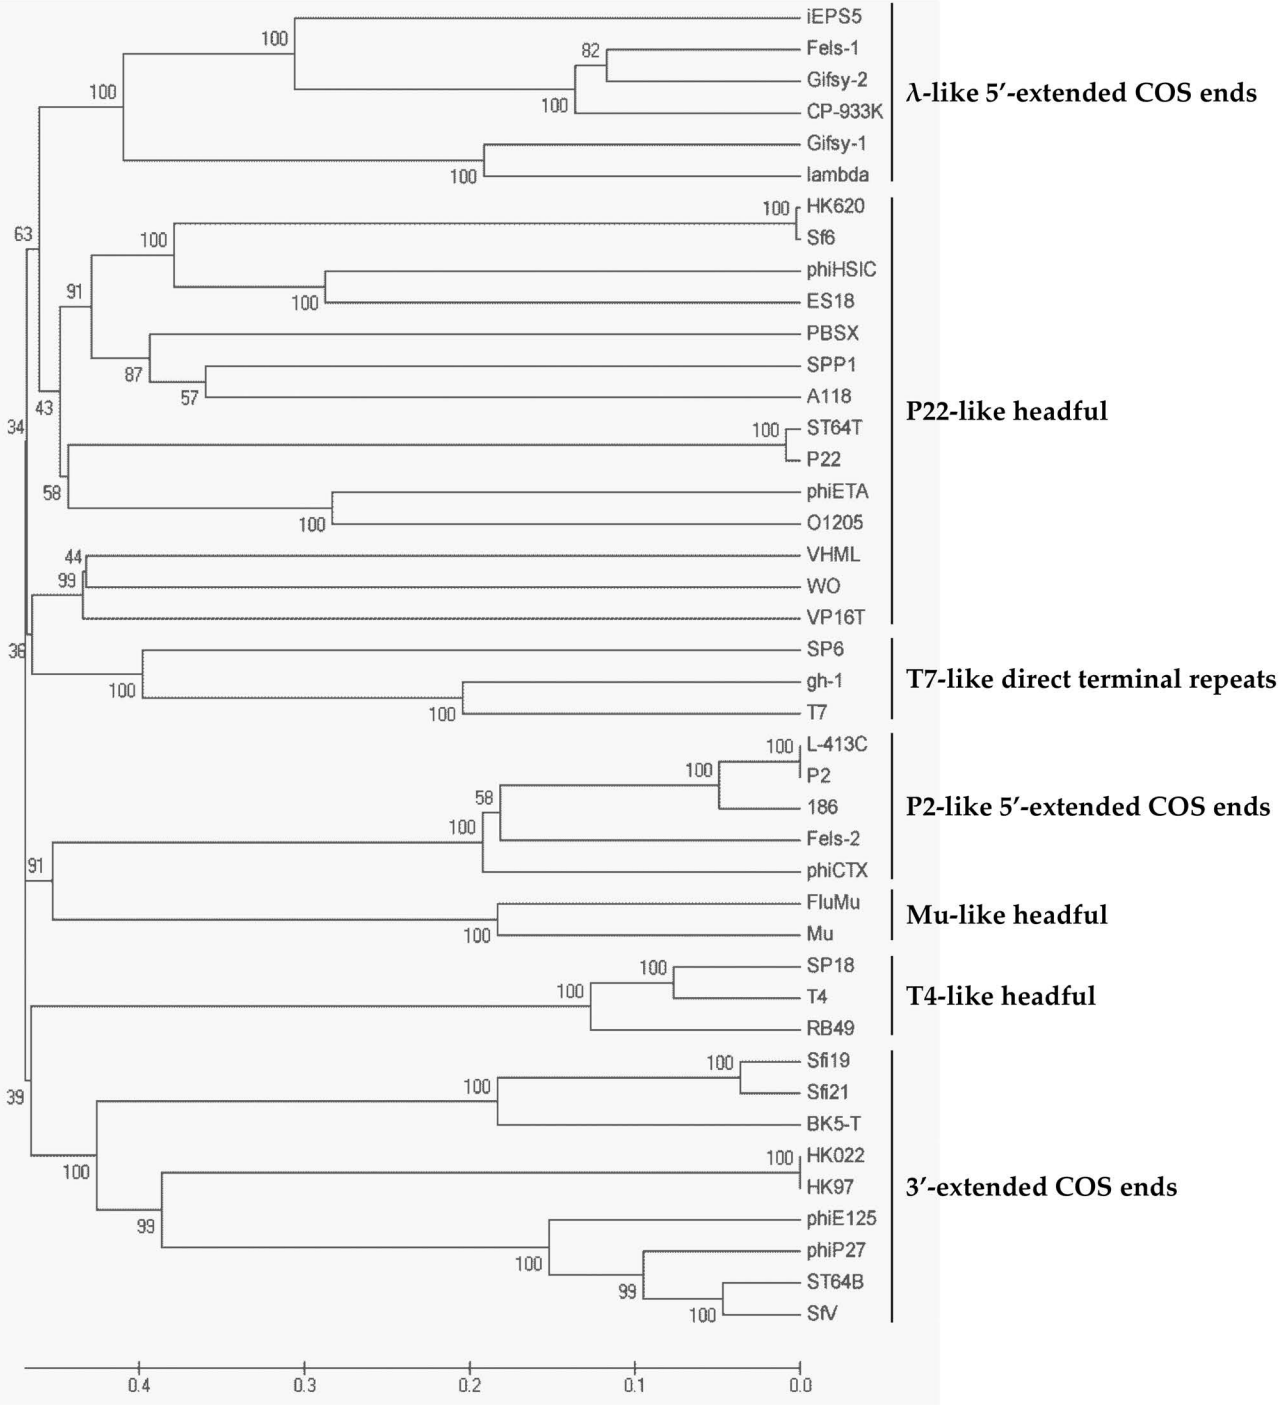

substitution/site
